# Supplementary material
Source: publisher figshare collection journal article supplement (https://karger.figshare.com/articles/dataset/_/5123521)

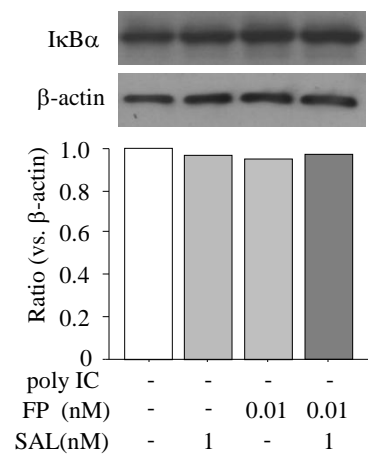

**Supplementary Fig. 3**

Supplement: Supplementary file 1 [file 1]

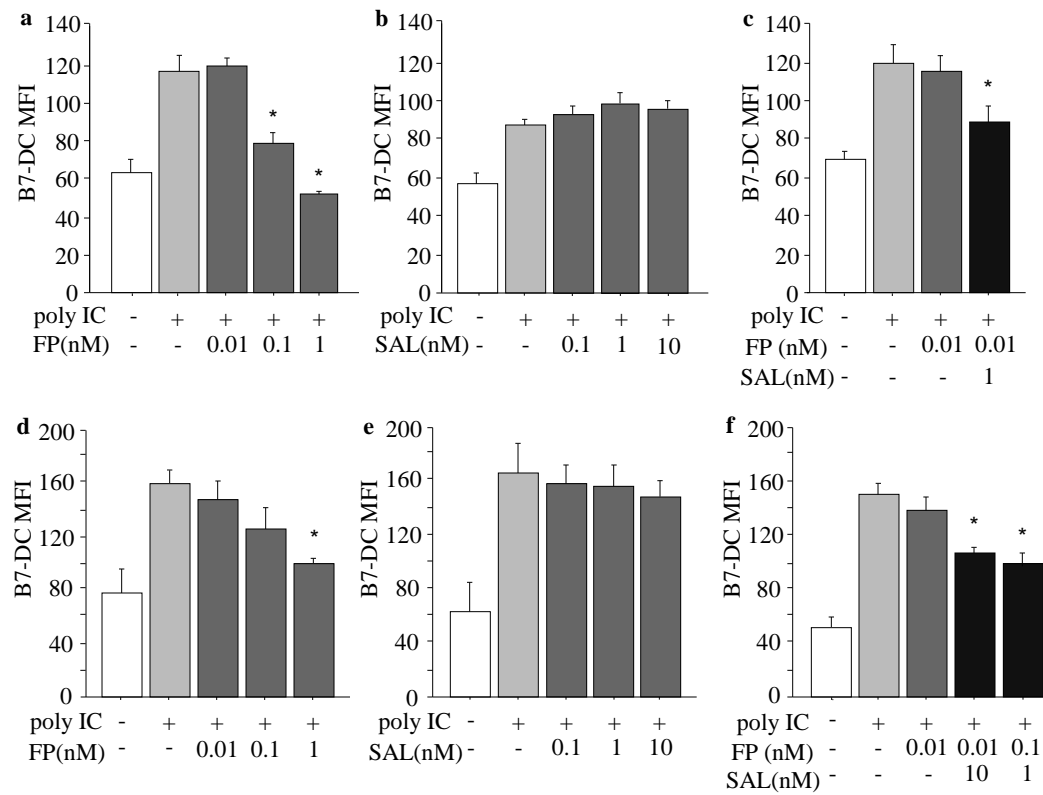

Supplementary Fig. 2

Supplement: Supplementary file 2 [file 1]

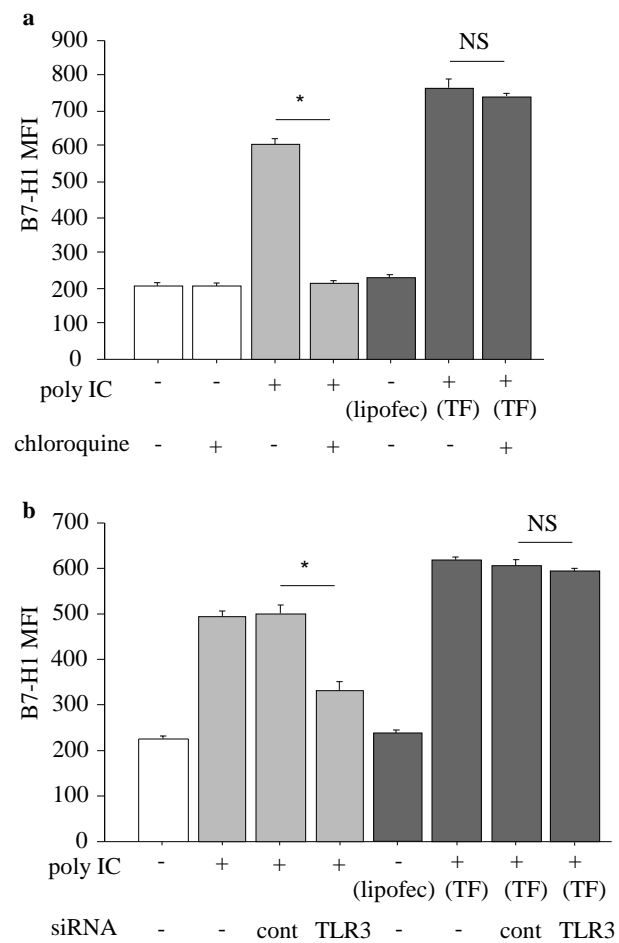

**Supplementary Fig. 1**

Supplement: Supplementary file 3 [file 1]
